# Supplementary material
Source: ML conference proceedings conference paper supplement (https://openreview.net/forum?id=XI72RT3hnnF)
Supplement: supplementary_material [file attachment]

# Supplementary material: Global Convergence of Online Optimization for Nonlinear Model Predictive Control

## A Expression of Newton System

For future references, we explicitly write out each component of (3). For stage  $k$ , we let  $H_k(\mathbf{z}_k, \boldsymbol{\lambda}_k) = \nabla_{\mathbf{z}_k}^2 (g_k(\mathbf{z}_k) - \boldsymbol{\lambda}_k^T f_k(\mathbf{z}_k))$ ,  $A_k(\mathbf{z}_k) = \nabla_{\mathbf{x}_k}^T f_k(\mathbf{z}_k)$  and  $B_k(\mathbf{z}_k) = \nabla_{\mathbf{u}_k}^T f_k(\mathbf{z}_k)$ . Then, we have

$$H^t(\tilde{\mathbf{z}}_t, \tilde{\boldsymbol{\lambda}}_t) = \text{diag} \left( H_t, \dots, H_{M_t-1}, \nabla_{\mathbf{x}_{M_t}}^2 g_{M_t}(\mathbf{x}_{M_t}, \mathbf{0}) + \mu I \right) \quad (12)$$

with  $H_k = H_k(\mathbf{z}_k, \boldsymbol{\lambda}_k)$  for  $k \in [t, M_t - 1]$ , and have

$$G^t(\tilde{\mathbf{z}}_t) = \begin{pmatrix} I & & & & & \\ -A_t & -B_t & & & & \\ & -A_{t+1} & -B_{t+1} & & & \\ & & & \ddots & & \\ & & & & \ddots & \\ & & & & & -A_{M_t-1} & -B_{M_t-1} & I \end{pmatrix} \quad (13)$$

with  $A_k = A_k(\mathbf{z}_k)$  and  $B_k = B_k(\mathbf{z}_k)$ . The gradient of Lagrangian  $\mathcal{L}^t(\cdot)$  on the right side of (3) can be expressed as

$$\begin{aligned} \nabla_{\tilde{\mathbf{z}}_t} \mathcal{L}^t(\tilde{\mathbf{z}}_t, \tilde{\boldsymbol{\lambda}}_t; \bar{\mathbf{x}}_t) &= \begin{pmatrix} \nabla_{\mathbf{z}_t} g_t(\mathbf{z}_t) + \boldsymbol{\lambda}_{t-1} - A_t^T(\mathbf{z}_t) \boldsymbol{\lambda}_t \\ \nabla_{\mathbf{u}_t} g_t(\mathbf{z}_t) - B_t^T(\mathbf{z}_t) \boldsymbol{\lambda}_t \\ \vdots \\ \nabla_{\mathbf{x}_{M_t-1}} g_{M_t-1}(\mathbf{z}_{M_t-1}) + \boldsymbol{\lambda}_{M_t-2} - A_{M_t-1}^T(\mathbf{z}_{M_t-1}) \boldsymbol{\lambda}_{M_t-1} \\ \nabla_{\mathbf{u}_{M_t-1}} g_{M_t-1}(\mathbf{z}_{M_t-1}) - B_{M_t-1}^T(\mathbf{z}_{M_t-1}) \boldsymbol{\lambda}_{M_t-1} \\ \nabla_{\mathbf{x}_{M_t}} g_{M_t}(\mathbf{x}_{M_t}, \mathbf{0}) + \boldsymbol{\lambda}_{M_t-1} + \mu \mathbf{x}_{M_t} \end{pmatrix}, \\ \nabla_{\tilde{\boldsymbol{\lambda}}_t} \mathcal{L}^t(\tilde{\mathbf{z}}_t, \tilde{\boldsymbol{\lambda}}_t; \bar{\mathbf{x}}_t) &= \begin{pmatrix} \mathbf{x}_t - \bar{\mathbf{x}}_t \\ \mathbf{x}_{t+1} - f_t(\mathbf{z}_t) \\ \vdots \\ \mathbf{x}_{M_t} - f_{M_t-1}(\mathbf{z}_t) \end{pmatrix}. \end{aligned} \quad (14)$$

We also explicitly write out the gradient of the augmented Lagrangian (5) by

$$\begin{pmatrix} \nabla_{\tilde{\mathbf{z}}_t} \mathcal{L}_{\eta}^t \\ \nabla_{\tilde{\boldsymbol{\lambda}}_t} \mathcal{L}_{\eta}^t \end{pmatrix} = \begin{pmatrix} I + \eta_2 H^t & \eta_1 (G^t)^T \\ \eta_2 G^t & I \end{pmatrix} \begin{pmatrix} \nabla_{\tilde{\mathbf{z}}_t} \mathcal{L}^t \\ \nabla_{\tilde{\boldsymbol{\lambda}}_t} \mathcal{L}^t \end{pmatrix}. \quad (15)$$

## B Proof of Theorem 4.4

We first have a simple observation: by Assumptions 4.1, 4.2, for any  $(\tilde{\mathbf{z}}_t, \tilde{\boldsymbol{\lambda}}_t) \in \mathcal{Z} \otimes \Lambda$  (by  $(\tilde{\mathbf{z}}_t, \tilde{\boldsymbol{\lambda}}_t) \in \mathcal{Z} \otimes \Lambda$  we mean  $(\tilde{\mathbf{z}}_{k,t}, \tilde{\boldsymbol{\lambda}}_{k,t}) \in \mathcal{Z} \times \Lambda$  for all stages  $k$  of the  $t$ -th subproblem),  $\|G^t(\tilde{\mathbf{z}}_t)\| \leq 1 + 2\Upsilon$ ,  $\|H^t(\tilde{\mathbf{z}}_t, \tilde{\boldsymbol{\lambda}}_t)\| \leq \Upsilon' + \mu$ , and

$$\|\nabla((G^t)^T \nabla_{\tilde{\boldsymbol{\lambda}}_t} \mathcal{L}^t)(\tilde{\mathbf{z}}_t, \tilde{\boldsymbol{\lambda}}_t; \bar{\mathbf{x}}_t)\| \leq \Upsilon', \quad \|\nabla(H^t \nabla_{\tilde{\mathbf{z}}_t} \mathcal{L}^t)(\tilde{\mathbf{z}}_t, \tilde{\boldsymbol{\lambda}}_t; \bar{\mathbf{x}}_t)\| \leq \Upsilon' + \mu^2 \quad (16)$$

for some constant  $\Upsilon'$  not depending on  $\mu$ . This is from the definitions (12)-(14) and noting that only the last block of  $H^t$  and the last row of  $\nabla_{\tilde{\mathbf{z}}_t} \mathcal{L}^t$  contain  $\mu$ . We can also replace  $\Upsilon$  in Assumption 4.2 by  $\Upsilon \leftarrow (1 + 2\Upsilon) \vee \Upsilon' \vee \delta$  and require  $\mu \geq \Upsilon$ . Then we have  $\|G^t\| \leq \Upsilon$ ,  $\|B^t\| \vee \|H^t\| \leq 2\mu$ ,  $\|\nabla((G^t)^T \nabla_{\tilde{\boldsymbol{\lambda}}_t} \mathcal{L}^t)\| \leq \Upsilon$ , and  $\|\nabla(H^t \nabla_{\tilde{\mathbf{z}}_t} \mathcal{L}^t)\| \leq 2\mu^2$ . By the definition of  $H^t$  in (12), without loss of generality we let the last block of  $B^t$  be  $\mu I$ .

We then provide a formula for the KKT matrix inverse. We suppress the index  $t$  since the results hold for any  $t \geq 0$ .

**Lemma B.1.** Let  $G^T = YK$  where  $Y$  has orthonormal columns that span  $\text{Im}(G^T)$  and  $K$  is a nonsingular square matrix (since  $G^T$  has full column rank), and let  $Z$  have orthonormal columns that span  $\text{Ker}(G)$ . If  $Z^T B Z$  is invertible, then

$$S := \begin{pmatrix} B & G^T \\ G & \mathbf{0} \end{pmatrix}^{-1} = \begin{pmatrix} S_1 & S_2^T \\ S_2 & S_3 \end{pmatrix}$$

where

$$\begin{aligned} S_1 &= Z(Z^T BZ)^{-1} Z^T, \\ S_2 &= K^{-1} Y^T (I - BZ(Z^T BZ)^{-1} Z^T), \\ S_3 &= K^{-1} Y^T (BZ(Z^T BZ)^{-1} Z^T B - B) Y K^{-1}. \end{aligned}$$

Under Assumption 4.2, we have  $\|S\| \leq 5\Upsilon^2 \mu^2 / \gamma_{RH}$ .

Given Lemma B.1, we apply (3) and (15) and have

$$\begin{pmatrix} \nabla_{\tilde{z}} \mathcal{L}_\eta^0 \\ \nabla_{\tilde{\lambda}} \mathcal{L}_\eta^0 \end{pmatrix}^T \begin{pmatrix} \Delta \tilde{z} \\ \Delta \tilde{\lambda} \end{pmatrix} = - \begin{pmatrix} \nabla_{\tilde{z}} \mathcal{L}_\eta^0 \\ \nabla_{\tilde{\lambda}} \mathcal{L}_\eta^0 \end{pmatrix}^T \begin{pmatrix} B & G^T \\ G & \mathbf{0} \end{pmatrix}^{-1} \begin{pmatrix} I + \eta_2 H & \eta_1 G^T \\ \eta_2 G & I \end{pmatrix} \begin{pmatrix} \nabla_{\tilde{z}} \mathcal{L}_\eta^0 \\ \nabla_{\tilde{\lambda}} \mathcal{L}_\eta^0 \end{pmatrix}.$$

By Lemma B.1, we define  $W = I - Z(Z^T BZ)^{-1} Z^T B$  and have

$$\begin{aligned} & \begin{pmatrix} B & G^T \\ G & \mathbf{0} \end{pmatrix}^{-1} \begin{pmatrix} I + \eta_2 H & \eta_1 G^T \\ \eta_2 G & I \end{pmatrix} \\ &= \begin{pmatrix} \eta_2 I + Z(Z^T BZ)^{-1} Z^T \{I + \eta_2 (H - B)\} & WY(K^{-1})^T \\ K^{-1} Y^T W^T \{I + \eta_2 (H - B)\} & \eta_1 I - K^{-1} Y^T B W Y (K^{-1})^T \end{pmatrix} \\ &=: W_1 + W_2 + W_3, \end{aligned} \tag{17}$$

where

$$\begin{aligned} W_1 &= \begin{pmatrix} \frac{\eta_2}{2} I & \mathbf{0} \\ \mathbf{0} & \frac{\eta_1}{2} I \end{pmatrix}, \\ W_2 &= \begin{pmatrix} \frac{\eta_2}{2} I & WY(K^{-1})^T \\ K^{-1} Y^T W^T & \frac{\eta_1}{2} I - K^{-1} Y^T B W Y (K^{-1})^T \end{pmatrix}, \\ W_3 &= \begin{pmatrix} Z(Z^T BZ)^{-1} Z^T \{I + \eta_2 (H - B)\} & \mathbf{0} \\ \eta_2 K^{-1} Y^T W^T (H - B) & \mathbf{0} \end{pmatrix}. \end{aligned}$$

We deal with each term separately. First, we have

$$\begin{aligned} & \begin{pmatrix} \nabla_{\tilde{z}} \mathcal{L}_\eta^0 \\ \nabla_{\tilde{\lambda}} \mathcal{L}_\eta^0 \end{pmatrix}^T W_3 \begin{pmatrix} \nabla_{\tilde{z}} \mathcal{L}_\eta^0 \\ \nabla_{\tilde{\lambda}} \mathcal{L}_\eta^0 \end{pmatrix} \\ &= \nabla_{\tilde{z}}^T \mathcal{L}_\eta^0 Z(Z^T BZ)^{-1} Z^T \nabla_{\tilde{z}} \mathcal{L}_\eta^0 + \eta_2 \nabla_{\tilde{z}}^T \mathcal{L}_\eta^0 Z(Z^T BZ)^{-1} Z^T (H - B) \nabla_{\tilde{z}} \mathcal{L}_\eta^0 \\ &\quad + \eta_2 \nabla_{\tilde{\lambda}}^T \mathcal{L}_\eta^0 K^{-1} Y^T W^T (H - B) \nabla_{\tilde{z}} \mathcal{L}_\eta^0 \\ &= (\Delta \tilde{z})^T BZ(Z^T BZ)^{-1} Z^T B \Delta \tilde{z} - \eta_2 (\Delta \tilde{z})^T BZ(Z^T BZ)^{-1} Z^T (H - B) \nabla_{\tilde{z}} \mathcal{L}_\eta^0 \\ &\quad - \eta_2 (\Delta \tilde{z})^T Y Y^T W^T (H - B) \nabla_{\tilde{z}} \mathcal{L}_\eta^0 \\ &= (\Delta \tilde{z})^T BZ(Z^T BZ)^{-1} Z^T B \Delta \tilde{z} - \eta_2 (\Delta \tilde{z})^T (I - W^T) (H - B) \nabla_{\tilde{z}} \mathcal{L}_\eta^0 \\ &\quad - \eta_2 (\Delta \tilde{z})^T Y Y^T W^T (H - B) \nabla_{\tilde{z}} \mathcal{L}_\eta^0 \\ &= (\Delta \tilde{z})^T BZ(Z^T BZ)^{-1} Z^T B \Delta \tilde{z} - \eta_2 (\Delta \tilde{z})^T (H - B) \nabla_{\tilde{z}} \mathcal{L}_\eta^0. \end{aligned} \tag{18}$$

Here, the second equality is due to the KKT system (3) and the fact that  $GZ = \mathbf{0}$ ; the third equality is due to the definition of  $W$ ; and the fourth equality is due to  $Y Y^T W^T = W^T$ . Let us decompose  $\Delta \tilde{z} = \Delta \tilde{v} + \Delta \tilde{u}$ , where  $\Delta \tilde{v} = Z \Delta \mathbf{v}$  is a vector in  $\text{Im}(Z)$ , and  $\Delta \tilde{u} = G^T \Delta \mathbf{u}$  is a vector in  $\text{Im}(G^T)$ . Since  $G \Delta \tilde{z} = -\nabla_{\tilde{\lambda}} \mathcal{L}_\eta^0$  from (3), we know  $\Delta \mathbf{u} = -(GG^T)^{-1} \nabla_{\tilde{\lambda}} \mathcal{L}_\eta^0$  and hence  $\Delta \tilde{u} = -G^T (GG^T)^{-1} \nabla_{\tilde{\lambda}} \mathcal{L}_\eta^0 = -Y (K^{-1})^T \nabla_{\tilde{\lambda}} \mathcal{L}_\eta^0$ . Plugging the decomposition into (18), we have

$$\begin{aligned} & \begin{pmatrix} \nabla_{\tilde{z}} \mathcal{L}_\eta^0 \\ \nabla_{\tilde{\lambda}} \mathcal{L}_\eta^0 \end{pmatrix}^T W_3 \begin{pmatrix} \nabla_{\tilde{z}} \mathcal{L}_\eta^0 \\ \nabla_{\tilde{\lambda}} \mathcal{L}_\eta^0 \end{pmatrix} \\ &= (\Delta \mathbf{v})^T Z^T BZ \Delta \mathbf{v} - 2(\Delta \mathbf{v})^T Z^T B Y (K^{-1})^T \nabla_{\tilde{\lambda}} \mathcal{L}_\eta^0 - \eta_2 (\Delta \tilde{z})^T (H - B) \nabla_{\tilde{z}} \mathcal{L}_\eta^0 \\ &\quad + \nabla_{\tilde{\lambda}}^T \mathcal{L}_\eta^0 K^{-1} Y^T BZ(Z^T BZ)^{-1} Z^T B Y (K^{-1})^T \nabla_{\tilde{\lambda}} \mathcal{L}_\eta^0 \\ &\geq \gamma_{RH} \|\Delta \mathbf{v}\|^2 - 4\mu \Upsilon \|\Delta \mathbf{v}\| \|\nabla_{\tilde{\lambda}} \mathcal{L}_\eta^0\| - \eta_2 \delta \|\Delta \tilde{z}\| \|\nabla_{\tilde{z}} \mathcal{L}_\eta^0\| \end{aligned}$$

$$\begin{aligned}
&\geq \frac{\gamma_{RH}}{2} \|\Delta \mathbf{v}\|^2 - \frac{8\mu^2 \Upsilon^2}{\gamma_{RH}} \|\nabla_{\tilde{\lambda}} \mathcal{L}^0\|^2 - \eta_2 \delta^2 \|\Delta \tilde{\mathbf{z}}\|^2 - \frac{\eta_2}{4} \|\nabla_{\tilde{\mathbf{z}}} \mathcal{L}^0\|^2 \\
&= \frac{\gamma_{RH}}{2} \|\Delta \mathbf{v}\|^2 - \frac{8\mu^2 \Upsilon^2}{\gamma_{RH}} \|\nabla_{\tilde{\lambda}} \mathcal{L}^0\|^2 - \eta_2 \delta^2 (\|\Delta \mathbf{v}\|^2 + \|\Delta \tilde{\mathbf{u}}\|^2) - \frac{\eta_2}{4} \|\nabla_{\tilde{\mathbf{z}}} \mathcal{L}^0\|^2 \\
&\geq \left( \frac{\gamma_{RH}}{2} - \eta_2 \delta^2 \right) \|\Delta \mathbf{v}\|^2 - \left( \frac{8\mu^2 \Upsilon^2}{\gamma_{RH}} + \eta_2 \delta^2 \Upsilon^2 \right) \|\nabla_{\tilde{\lambda}} \mathcal{L}^0\|^2 - \frac{\eta_2}{4} \|\nabla_{\tilde{\mathbf{z}}} \mathcal{L}^0\|^2,
\end{aligned}$$

where the second and fifth inequalities are due to Assumption 4.2, which implies  $\|K^{-1}\| \leq \Upsilon$ ,  $\|B\| \vee \|H\| \leq 2\mu$ ; the third inequality is due to Young's inequality; and the fourth equality is due to  $\|\Delta \tilde{\mathbf{z}}\|^2 = \|\Delta \tilde{\mathbf{v}}\|^2 + \|\Delta \tilde{\mathbf{u}}\|^2 = \|\Delta \mathbf{v}\|^2 + \|\Delta \tilde{\mathbf{u}}\|^2$ . Using the above display and supposing

$$\frac{\gamma_{RH}}{2} - \eta_2 \delta^2 \geq 0 \iff \eta_2 \leq \frac{\gamma_{RH}}{2\delta^2}, \quad (19)$$

we further have

$$\begin{aligned}
\begin{pmatrix} \nabla_{\tilde{\mathbf{z}}} \mathcal{L}^0 \\ \nabla_{\tilde{\lambda}} \mathcal{L}^0 \end{pmatrix}^T W_3 \begin{pmatrix} \nabla_{\tilde{\mathbf{z}}} \mathcal{L}^0 \\ \nabla_{\tilde{\lambda}} \mathcal{L}^0 \end{pmatrix} &\geq - \left( \frac{8\mu^2 \Upsilon^2}{\gamma_{RH}} + \frac{\gamma_{RH} \Upsilon^2}{2} \right) \|\nabla_{\tilde{\lambda}} \mathcal{L}^0\|^2 - \frac{\eta_2}{4} \|\nabla_{\tilde{\mathbf{z}}} \mathcal{L}^0\|^2 \\
&\geq - \frac{9\mu^2 \Upsilon^2}{\gamma_{RH}} \|\nabla_{\tilde{\lambda}} \mathcal{L}^0\|^2 - \frac{\eta_2}{4} \|\nabla_{\tilde{\mathbf{z}}} \mathcal{L}^0\|^2.
\end{aligned} \quad (20)$$

Let us now deal with  $W_2$ . By Schur complement, in order to show  $W_2 \succeq \mathbf{0}$ , we only have to let

$$\frac{\eta_1}{2} I - K^{-1} Y^T B W Y (K^{-1})^T - \frac{2}{\eta_2} K^{-1} Y^T W^T W Y (K^{-1})^T \succeq \mathbf{0}. \quad (21)$$

Note that  $-K^{-1} Y^T B W Y (K^{-1})^T \succeq -K^{-1} Y^T B Y (K^{-1})^T$  and

$$\begin{aligned}
\|K^{-1} Y^T B Y (K^{-1})^T + \frac{2}{\eta_2} K^{-1} Y^T W^T W Y (K^{-1})^T\| &\leq 2\mu \Upsilon^2 + \frac{2\Upsilon^2}{\eta_2} \|W\|^2 \\
&\leq 2\mu \Upsilon^2 + \frac{2\Upsilon^2}{\eta_2} \left( 1 + \frac{2\mu}{\gamma_{RH}} \right)^2 = 2\mu \Upsilon^2 + \frac{2\Upsilon^2}{\eta_2} + \frac{8\mu \Upsilon^2}{\eta_2 \gamma_{RH}} + \frac{8\mu^2 \Upsilon^2}{\eta_2 \gamma_{RH}^2} \\
&\leq \frac{12\mu \Upsilon^2}{\eta_2 \gamma_{RH}} + \frac{8\mu^2 \Upsilon^2}{\eta_2 \gamma_{RH}^2} \leq \frac{16\mu^2 \Upsilon^2}{\eta_2 \gamma_{RH}^2},
\end{aligned}$$

where the fifth inequality supposes  $\gamma_{RH} \leq \sqrt{2}\delta$  (without loss of generality, since  $\delta$  is upper bound and  $\gamma_{RH}$  is lower bound in Assumption 4.2) so that  $\eta_2 \gamma_{RH} \leq 1$ ; and the last inequality uses  $\mu \geq 2\gamma_{RH}$ . Thus, we only have to let

$$\frac{\eta_1}{2} \geq \frac{16\mu^2 \Upsilon^2}{\eta_2 \gamma_{RH}^2} \iff \eta_1 \eta_2 \geq \frac{32\mu^2 \Upsilon^2}{\gamma_{RH}^2}, \quad (22)$$

then (21) is satisfied and  $W_2 \succeq \mathbf{0}$ . Combining (17), (20), and noting that  $W_1$  is a diagonal matrix, we obtain that under (19) and (22),

$$\begin{pmatrix} \nabla_{\tilde{\mathbf{z}}} \mathcal{L}_\eta^0 \\ \nabla_{\tilde{\lambda}} \mathcal{L}_\eta^0 \end{pmatrix}^T \begin{pmatrix} \Delta \tilde{\mathbf{z}} \\ \Delta \tilde{\lambda} \end{pmatrix} \leq - \begin{pmatrix} \nabla_{\tilde{\mathbf{z}}} \mathcal{L}_\eta^0 \\ \nabla_{\tilde{\lambda}} \mathcal{L}_\eta^0 \end{pmatrix}^T \begin{pmatrix} \frac{\eta_2}{4} & \mathbf{0} \\ \mathbf{0} & \frac{\eta_1}{2} - \frac{9\mu^2 \Upsilon^2}{\gamma_{RH}} \end{pmatrix} \begin{pmatrix} \nabla_{\tilde{\mathbf{z}}} \mathcal{L}_\eta^0 \\ \nabla_{\tilde{\lambda}} \mathcal{L}_\eta^0 \end{pmatrix}.$$

Using  $\gamma_{RH} \leq 6\mu\delta\Upsilon$ , we can easily check that, as long as  $\eta = (\eta_1, \eta_2)$  satisfies

$$\eta_1 \geq \frac{25\mu^2 \Upsilon^2}{\gamma_{RH}} =: \tau_1, \quad \eta_2 \leq \frac{\gamma_{RH}}{2\delta^2} =: \tau_2, \quad \eta_1 \eta_2 \geq \frac{32\mu^2 \Upsilon^2}{\gamma_{RH}^2} =: \tau_3,$$

we have

$$\begin{pmatrix} \nabla_{\tilde{\mathbf{z}}} \mathcal{L}_\eta^0 \\ \nabla_{\tilde{\lambda}} \mathcal{L}_\eta^0 \end{pmatrix}^T \begin{pmatrix} \Delta \tilde{\mathbf{z}} \\ \Delta \tilde{\lambda} \end{pmatrix} \leq - \frac{\eta_2}{4} \left\| \begin{pmatrix} \nabla_{\tilde{\mathbf{z}}} \mathcal{L}_\eta^0 \\ \nabla_{\tilde{\lambda}} \mathcal{L}_\eta^0 \end{pmatrix} \right\|^2.$$

This completes the proof of the first part of the statement. For the second part of the statement. We note that  $\eta_2^0 = 1$  and each While loop decreases  $\eta_2^0$  by  $\rho$ . Thus, to satisfy  $\eta_2 \leq \tau_2$ , the number of the

required While loop iterations  $\mathcal{T}$  only need satisfy  $\rho^{\mathcal{T}} \geq 1/\tau_2$ . For the similar reason, we require  $\rho^{\mathcal{T}} \geq \tau_3/\mu^2$  and  $\rho^{\mathcal{T}} \geq \sqrt{\tau_1}/\mu^2$ . Combining them together, we know if  $\mathcal{T}$  satisfies

$$\rho^{\mathcal{T}} \geq \left( \frac{1}{\tau_2} \vee \frac{\tau_3}{\mu^2} \vee \sqrt{\frac{\tau_1}{\mu^2}} \right) = \frac{32\Upsilon^2}{\gamma_{RH}^2},$$

then no other iterations will go into the While loop again. Thus, we know  $\rho^{\mathcal{T}} \leq \frac{32\Upsilon^2\rho}{\gamma_{RH}^2}$ . Moreover,

$$\bar{\eta}_2 = 1/\rho^{\mathcal{T}} \geq \frac{\gamma_{RH}}{32\Upsilon^2\rho}, \quad \text{and} \quad \bar{\eta}_1 = \mu^2(\rho^{\mathcal{T}})^2 \leq \frac{32^2\rho^2\mu^2\Upsilon^4}{\gamma_{RH}^4}.$$

This completes the second part of the statement.

## C Proof of Lemma B.1

We note that  $YY^T + ZZ^T = I$ . Thus,  $YY^T(I - BZ(Z^TBZ)^{-1}Z^T) = I - BZ(Z^TBZ)^{-1}Z^T$ . Using this observation, the formula of  $S$  can be verified directly by checking  $SS^{-1} = I$ . Moreover, under Assumption 4.2, we know

$$\|(Z^TBZ)^{-1}\| \leq 1/\gamma_{RH}, \quad \|K^{-1}\| \leq \Upsilon, \quad \text{and} \quad \|B\| \leq 2\mu.$$

Therefore,

$$\|S\| \leq \|S_1\| + 2\|S_2\| + \|S_3\| \leq \frac{1}{\gamma_{RH}} + 2\Upsilon\left(1 + \frac{2\mu}{\gamma_{RH}}\right) + \Upsilon^2 \left( \frac{4\mu^2}{\gamma_{RH}} + 2\mu \right).$$

Without loss of generality, we suppose  $\Upsilon \geq 4$  and  $\mu \geq 2(\gamma_{RH} + 1)$ . Then

$$\|S\| \leq \frac{1}{\gamma_{RH}} + \frac{6\Upsilon\mu}{\gamma_{RH}} + 2\mu\Upsilon^2 + \frac{4\Upsilon^2\mu^2}{\gamma_{RH}} \leq \frac{\Upsilon^2\mu^2}{\gamma_{RH}} + \frac{4\Upsilon^2\mu^2}{\gamma_{RH}} \leq \frac{5\Upsilon^2\mu^2}{\gamma_{RH}}.$$

This completes the proof.

## D Proof of Theorem 4.5

We drop off the index  $t$  for simplicity. By the definition of  $\mathcal{L}_\eta(\cdot)$  in (5), we have

$$\nabla^2 \mathcal{L}_\eta(\tilde{z}, \tilde{\lambda}; \bar{x}) = \begin{pmatrix} H + \eta_2 \nabla_{\tilde{z}}(H \nabla_{\tilde{z}} \mathcal{L}) + \eta_1 \nabla_{\tilde{z}}(G^T \nabla_{\tilde{\lambda}} \mathcal{L}) & \eta_2 \nabla_{\tilde{\lambda}}^T(H \nabla_{\tilde{z}} \mathcal{L}) + G^T \\ \eta_2 \nabla_{\tilde{\lambda}}(H \nabla_{\tilde{z}} \mathcal{L}) + G & \eta_2 G G^T \end{pmatrix}.$$

Using Assumption 4.2, (16), and Theorem 4.4, we know

$$\|\nabla^2 \mathcal{L}_\eta(\tilde{z}, \tilde{\lambda}; \bar{x})\| \leq 4\bar{\eta}_1 \Upsilon \leq \frac{32^2 \rho^2 \mu^2 \Upsilon^5}{\gamma_{RH}} =: \mu^2 \Upsilon'.$$

Therefore, by Taylor expansion

$$\mathcal{L}_\eta^1 \leq \mathcal{L}_\eta^0 + \alpha \begin{pmatrix} \nabla_{\tilde{z}} \mathcal{L}_\eta^0 \\ \nabla_{\tilde{\lambda}} \mathcal{L}_\eta^0 \end{pmatrix}^T \begin{pmatrix} \Delta \tilde{z} \\ \Delta \tilde{\lambda} \end{pmatrix} + \frac{\mu^2 \Upsilon' \alpha^2}{2} \left\| \begin{pmatrix} \Delta \tilde{z} \\ \Delta \tilde{\lambda} \end{pmatrix} \right\|^2. \quad (23)$$

Moreover, by Lemma B.1 and the condition (7), we further have

$$\left\| \begin{pmatrix} \Delta \tilde{z} \\ \Delta \tilde{\lambda} \end{pmatrix} \right\|^2 \leq \frac{25\mu^4 \Upsilon^4}{\gamma_{RH}^2} \left\| \begin{pmatrix} \nabla_{\tilde{z}} \mathcal{L}^0 \\ \nabla_{\tilde{\lambda}} \mathcal{L}^0 \end{pmatrix} \right\|^2 \leq -\frac{100\mu^4 \Upsilon^4}{\bar{\eta}_2 \gamma_{RH}} \begin{pmatrix} \nabla_{\tilde{z}} \mathcal{L}_\eta^0 \\ \nabla_{\tilde{\lambda}} \mathcal{L}_\eta^0 \end{pmatrix}^T \begin{pmatrix} \Delta \tilde{z} \\ \Delta \tilde{\lambda} \end{pmatrix}.$$

Plugging the above display into (23),

$$\mathcal{L}_\eta^1 \leq \mathcal{L}_\eta^0 + \alpha \left( 1 - \frac{50\mu^6 \Upsilon' \Upsilon^4}{\bar{\eta}_2 \gamma_{RH}} \alpha \right) \begin{pmatrix} \nabla_{\tilde{z}} \mathcal{L}_\eta^0 \\ \nabla_{\tilde{\lambda}} \mathcal{L}_\eta^0 \end{pmatrix}^T \begin{pmatrix} \Delta \tilde{z} \\ \Delta \tilde{\lambda} \end{pmatrix}.$$

Thus, as long as

$$1 - \frac{50\mu^6 \Upsilon' \Upsilon^4}{\bar{\eta}_2 \gamma_{RH}} \alpha \geq \beta \iff \alpha \leq \frac{(1-\beta)\bar{\eta}_2 \gamma_{RH}}{50\mu^6 \Upsilon' \Upsilon^4} \iff \alpha \leq \frac{(1-\beta)\gamma_{RH}^2}{32 \cdot 50\mu^6 \Upsilon' \Upsilon^6} =: \bar{\alpha}',$$

then Armijo condition (6) is satisfied. Thus, if we use backtracking line search, the selected stepsize  $\alpha \geq \nu \bar{\alpha}' =: \bar{\alpha}$  for some  $\nu \in (0, 1)$ . Moreover, by Armijo condition,

$$\mathcal{L}_\eta^1 \leq \mathcal{L}_\eta^0 + \alpha \beta \begin{pmatrix} \nabla_{\tilde{z}} \mathcal{L}_\eta^0 \\ \nabla_{\tilde{\lambda}} \mathcal{L}_\eta^0 \end{pmatrix}^T \begin{pmatrix} \Delta \tilde{z} \\ \Delta \tilde{\lambda} \end{pmatrix} \leq \mathcal{L}_\eta^0 - \frac{\bar{\eta}_2 \bar{\alpha} \beta}{4} \left\| \begin{pmatrix} \nabla_{\tilde{z}} \mathcal{L}^0 \\ \nabla_{\tilde{\lambda}} \mathcal{L}^0 \end{pmatrix} \right\|^2.$$

This completes the proof.

## E Proof of Lemma 4.6

By the definition (5), we know

$$\begin{aligned}
& \mathcal{L}_{\bar{\eta}}^{t,1} - \mathcal{L}_{\bar{\eta}}^{t+1,0} \\
&= \mathcal{L}^{t,1} - \mathcal{L}^{t+1,0} + \frac{\bar{\eta}_1}{2} \left( \|\nabla_{\bar{\lambda}_t} \mathcal{L}^{t,1}\|^2 - \|\nabla_{\bar{\lambda}_{t+1}} \mathcal{L}^{t+1,0}\|^2 \right) + \frac{\bar{\eta}_2}{2} \left( \|\nabla_{\bar{z}_t} \mathcal{L}^{t,1}\|^2 - \|\nabla_{\bar{z}_{t+1}} \mathcal{L}^{t+1,0}\|^2 \right) \\
&=: Term_1 + Term_2 + Term_3. \tag{24}
\end{aligned}$$

Let us deal with each term separately. For  $Term_1$ , we apply the definition of Lagrangian function, the transition (8), and the fact that  $g(\mathbf{0}, \mathbf{0}) = 0$ . Then

$$\begin{aligned}
\mathcal{L}^{t+1,0} &= \sum_{k=t+1}^{M_t} \{g_k(\mathbf{z}_{k,t+1}^0) + (\boldsymbol{\lambda}_{k-1,t+1}^0)^T \mathbf{x}_{k,t+1}^0 - (\boldsymbol{\lambda}_{k,t+1}^0)^T f_k(\mathbf{z}_{k,t+1}^0)\} + g_{M_t+1}(\mathbf{x}_{M_t+1,t+1}^0, \mathbf{0}) \\
&\quad + \frac{\mu}{2} \|\mathbf{x}_{M_t+1,t+1}^0\|^2 + (\boldsymbol{\lambda}_{M_t,t+1}^0)^T \mathbf{x}_{M_t+1,t+1}^0 - (\boldsymbol{\lambda}_{t,t+1}^0)^T \bar{\mathbf{x}}_{t+1} \\
&= \sum_{k=t+1}^{M_t-1} \{g_k(\mathbf{z}_{k,t}^1) + (\boldsymbol{\lambda}_{k-1,t}^1)^T \mathbf{x}_{k,t}^1 - (\boldsymbol{\lambda}_{k,t}^1)^T f_k(\mathbf{z}_{k,t}^1)\} + g_{M_t}(\mathbf{x}_{M_t,t}^1, \mathbf{0}) + (\boldsymbol{\lambda}_{M_t-1,t}^1)^T \mathbf{x}_{M_t,t}^1 \\
&\quad - (\boldsymbol{\lambda}_{t,t}^1)^T f_t(\mathbf{z}_{t,t}^1).
\end{aligned}$$

Using the above display, we further have

$$\begin{aligned}
Term_1 &= \mathcal{L}^{t,1} - \mathcal{L}^{t+1,0} \\
&= \sum_{k=t}^{M_t-1} \{g_k(\mathbf{z}_{k,t}^1) + (\boldsymbol{\lambda}_{k-1,t}^1)^T \mathbf{x}_{k,t}^1 - (\boldsymbol{\lambda}_{k,t}^1)^T f_k(\mathbf{z}_{k,t}^1)\} + g_{M_t}(\mathbf{x}_{M_t,t}^1, \mathbf{0}) + \frac{\mu}{2} \|\mathbf{x}_{M_t,t}^1\|^2 \\
&\quad + (\boldsymbol{\lambda}_{M_t-1,t}^1)^T \mathbf{x}_{M_t,t}^1 - (\boldsymbol{\lambda}_{t-1,t}^1)^T \bar{\mathbf{x}}_t - \mathcal{L}^{t+1,0} \\
&= g_t(\mathbf{z}_{t,t}^1) + (\boldsymbol{\lambda}_{t-1,t}^1)^T (\mathbf{x}_{t,t}^1 - \bar{\mathbf{x}}_t) + \frac{\mu}{2} \|\mathbf{x}_{M_t,t}^1\|^2 \\
&\geq -\|\boldsymbol{\lambda}_{t-1,t}^1\| \|\mathbf{x}_{t,t}^1 - \bar{\mathbf{x}}_t\| + \frac{\mu}{2} \|\mathbf{x}_{M_t,t}^1\|^2 \\
&\geq -C \|\mathbf{x}_{t,t}^1 - \bar{\mathbf{x}}_t\|^2 + \frac{\mu}{2} \|\mathbf{x}_{M_t,t}^1\|^2, \tag{25}
\end{aligned}$$

where the last inequality is due to Assumption 4.3(ii). For  $Term_2$ , we apply the formula (14) and the transition (8). We have

$$\begin{aligned}
\|\nabla_{\bar{\lambda}_{t+1}} \mathcal{L}^{t+1,0}\|^2 &= \sum_{k=t+1}^{M_t} \|\mathbf{x}_{k+1,t+1}^0 - f_k(\mathbf{z}_{k,t+1}^0)\|^2 + \|\mathbf{x}_{t+1,t+1}^0 - \bar{\mathbf{x}}_{t+1}\|^2 \\
&= \sum_{k=t+1}^{M_t-1} \|\mathbf{x}_{k+1,t}^1 - f_k(\mathbf{z}_{k,t}^1)\|^2 + \|f_{M_t}(\mathbf{x}_{M_t,t}^1, \mathbf{0})\|^2 + \|\mathbf{x}_{t+1,t}^1 - f_t(\mathbf{z}_{t,t}^1)\|^2 \\
&= \sum_{k=t}^{M_t-1} \|\mathbf{x}_{k+1,t}^1 - f_k(\mathbf{z}_{k,t}^1)\|^2 + \|f_{M_t}(\mathbf{x}_{M_t,t}^1, \mathbf{0})\|^2.
\end{aligned}$$

Using the above display, we further have

$$\begin{aligned}
Term_2 &= \frac{\bar{\eta}_1}{2} \left( \|\nabla_{\bar{\lambda}_t} \mathcal{L}^{t,1}\|^2 - \|\nabla_{\bar{\lambda}_{t+1}} \mathcal{L}^{t+1,0}\|^2 \right) = \frac{\bar{\eta}_1}{2} \|\mathbf{x}_{t,t}^1 - \bar{\mathbf{x}}_t\|^2 - \frac{\bar{\eta}_1}{2} \|f_{M_t}(\mathbf{x}_{M_t,t}^1, \mathbf{0})\|^2 \\
&\geq \frac{\bar{\eta}_1}{2} \|\mathbf{x}_{t,t}^1 - \bar{\mathbf{x}}_t\|^2 - \frac{\bar{\eta}_1 \Upsilon^2}{2} \|\mathbf{x}_{M_t,t}^1\|^2, \tag{26}
\end{aligned}$$

where the last inequality is due to Assumption 4.2. Last, for  $Term_3$ , we apply the formula (14) and the transition (8). We have

$$\begin{aligned} \|\nabla_{\bar{z}_{t+1}} \mathcal{L}^{t+1,0}\|^2 &= \sum_{k=t+1}^{M_t} \left\| \begin{pmatrix} \nabla_{\mathbf{x}_k} g_k(\mathbf{z}_{k,t+1}^0) + \boldsymbol{\lambda}_{k-1,t+1}^0 - A_k^T(\mathbf{z}_{k,t+1}^0) \boldsymbol{\lambda}_{k,t+1}^0 \\ \nabla_{\mathbf{u}_k} g_k(\mathbf{z}_{k,t+1}^0) - B_k^T(\mathbf{z}_{k,t+1}^0) \boldsymbol{\lambda}_{k,t+1}^0 \end{pmatrix} \right\|^2 \\ &\quad + \|\nabla_{\mathbf{x}_{M_{t+1}}} g_{M_{t+1}}(\mathbf{x}_{M_{t+1},t+1}^0, \mathbf{0}) + \boldsymbol{\lambda}_{M_t,t+1}^0 + \mu \mathbf{x}_{M_{t+1},t+1}^0\|^2 \\ &= \sum_{k=t+1}^{M_t-1} \left\| \begin{pmatrix} \nabla_{\mathbf{x}_k} g_k(\mathbf{z}_{k,t}^1) + \boldsymbol{\lambda}_{k-1,t}^1 - A_k^T(\mathbf{z}_{k,t}^1) \boldsymbol{\lambda}_{k,t}^1 \\ \nabla_{\mathbf{u}_k} g_k(\mathbf{z}_{k,t}^1) - B_k^T(\mathbf{z}_{k,t}^1) \boldsymbol{\lambda}_{k,t}^1 \end{pmatrix} \right\|^2 \\ &\quad + \left\| \begin{pmatrix} \nabla_{\mathbf{x}_{M_t}} g_{M_t}(\mathbf{x}_{M_t,t}^1, \mathbf{0}) + \boldsymbol{\lambda}_{M_t-1,t}^1 \\ \nabla_{\mathbf{u}_{M_t}} g_{M_t}(\mathbf{x}_{M_t,t}^1, \mathbf{0}) \end{pmatrix} \right\|^2. \end{aligned}$$

Using the above display, we further have

$$\begin{aligned} Term_3 &= \frac{\bar{\eta}_2}{2} \left( \|\nabla_{\bar{z}_t} \mathcal{L}^{t,1}\|^2 - \|\nabla_{\bar{z}_{t+1}} \mathcal{L}^{t+1,0}\|^2 \right) \\ &\geq \frac{\bar{\eta}_2}{2} \left( \|\nabla_{\mathbf{x}_{M_t}} g_{M_t}(\mathbf{x}_{M_t,t}^1, \mathbf{0}) + \boldsymbol{\lambda}_{M_t-1,t}^1 + \mu \mathbf{x}_{M_t,t}^1\|^2 - \left\| \begin{pmatrix} \nabla_{\mathbf{x}_{M_t}} g_{M_t}(\mathbf{x}_{M_t,t}^1, \mathbf{0}) + \boldsymbol{\lambda}_{M_t-1,t}^1 \\ \nabla_{\mathbf{u}_{M_t}} g_{M_t}(\mathbf{x}_{M_t,t}^1, \mathbf{0}) \end{pmatrix} \right\|^2 \right) \\ &\geq \frac{\bar{\eta}_2(\mu^2 - \Upsilon^2)}{2} \|\mathbf{x}_{M_t,t}^1\|^2 + \bar{\eta}_2 \mu \left( (\mathbf{x}_{M_t,t}^1)^T \nabla_{\mathbf{x}_{M_t}} g_{M_t}(\mathbf{x}_{M_t,t}^1, \mathbf{0}) + (\mathbf{x}_{M_t,t}^1)^T \boldsymbol{\lambda}_{M_t-1,t}^1 \right) \\ &\geq \frac{\bar{\eta}_2(\mu^2 - \Upsilon^2 - 2\mu\Upsilon)}{2} \|\mathbf{x}_{M_t,t}^1\|^2 + \bar{\eta}_2 \mu (\mathbf{x}_{M_t,t}^1)^T \boldsymbol{\lambda}_{M_t-1,t}^1, \end{aligned}$$

where the second inequality is due to the definition of  $\nabla_{\bar{z}_t} \mathcal{L}^{t,1}$ ; and the third and the fourth inequalities are due to Assumption 4.2, which implies  $\|\nabla_{\mathbf{z}_{M_t}} g_{M_t}(\mathbf{x}_{M_t,t}^1, \mathbf{0})\| \leq \Upsilon \|\mathbf{x}_{M_t,t}^1\|$ . Noting that  $\boldsymbol{\lambda}_{M_t-1,t}^0 = \mathbf{0}$  and, by (3),

$$\mu \Delta \tilde{\mathbf{x}}_{M_t,t} + \Delta \tilde{\boldsymbol{\lambda}}_{M_t-1,t} = - \left( \nabla_{\mathbf{x}_{M_t}} g_{M_t}(\mathbf{x}_{M_t,t}^0, \mathbf{0}) + \boldsymbol{\lambda}_{M_t-1,t}^0 + \mu \mathbf{x}_{M_t,t}^0 \right) = \mathbf{0},$$

we then have

$$(\mathbf{x}_{M_t,t}^1)^T \boldsymbol{\lambda}_{M_t-1,t}^1 = -\alpha_t \mu (\mathbf{x}_{M_t,t}^1)^T \Delta \tilde{\mathbf{x}}_{M_t,t} = -\mu \|\mathbf{x}_{M_t,t}^1\|^2.$$

Suppose  $\mu \geq 4\Upsilon$ , then  $\mu^2 - \Upsilon^2 - 2\mu\Upsilon \geq \mu^2/2$ . Together with the above three displays,

$$Term_3 \geq -\bar{\eta}_2 \mu^2 \|\mathbf{x}_{M_t,t}^1\|^2. \quad (27)$$

Combining (24), (25), (26), and (27), and noting that  $\bar{\eta}_2 \mu^2 \leq \mu^2 \leq \bar{\eta}_1 \Upsilon^2/2$ , we have

$$\begin{aligned} \mathcal{L}_{\bar{\eta}}^{t,1} - \mathcal{L}_{\bar{\eta}}^{t+1,0} &\geq \left( \frac{\bar{\eta}_1}{2} - C \right) \|\mathbf{x}_{t,t}^1 - \bar{\mathbf{x}}_t\|^2 + \left( \frac{\mu}{2} - \frac{\bar{\eta}_1 \Upsilon^2}{2} - \bar{\eta}_2 \mu^2 \right) \|\mathbf{x}_{M_t,t}^1\|^2 \\ &\geq \left( \frac{\mu^2}{2} - C \right) \|\mathbf{x}_{t,t}^1 - \bar{\mathbf{x}}_t\|^2 - \bar{\eta}_1 \Upsilon^2 \|\mathbf{x}_{M_t,t}^1\|^2 \geq -\bar{\eta}_1 \Upsilon^2 \|\mathbf{x}_{M_t,t}^1\|^2, \end{aligned}$$

where the last inequality holds if  $C \leq \mu^2/2$ . By Lemma B.1, Theorem 4.4 and Assumption 4.3(i),

$$\begin{aligned} \bar{\eta}_1 \Upsilon^2 \|\mathbf{x}_{M_t,t}^1\|^2 &\leq \frac{32^2 \rho^2 \Upsilon^6}{\gamma_{RH}^4} \mu^2 \alpha_t^2 \|\Delta \tilde{\mathbf{x}}_{M_t,t}\|^2 = \frac{32^2 \rho^2 \Upsilon^6}{\gamma_{RH}^4} \alpha_t^2 \|\Delta \tilde{\boldsymbol{\lambda}}_{M_t-1,t}\|^2 \\ &\leq \frac{32^2 \rho^2 \Upsilon^6}{\gamma_{RH}^4} c^2 \|\Delta \tilde{\mathbf{z}}_t, \Delta \tilde{\boldsymbol{\lambda}}_t\|^2 \leq \frac{32^2 \rho^2 \Upsilon^6 c^2}{\gamma_{RH}^4} \|\nabla \mathcal{L}^{t,0}\|^2. \end{aligned}$$

We require

$$\begin{aligned} \frac{32^2 \rho^2 \Upsilon^6 c^2}{\gamma_{RH}^4} &\leq \frac{\bar{\eta}_2 \bar{\alpha} \beta}{8} \iff \frac{32^2 \rho^2 \Upsilon^6 c^2}{\gamma_{RH}^4} \leq \frac{\beta \gamma_{RH} \bar{\alpha}}{8 \times 32 \rho \Upsilon^2} \\ &\iff \frac{32^2 \rho^2 \Upsilon^6 c^2}{\gamma_{RH}^4} \leq \frac{\beta(1-\beta) \gamma_{RH}^3}{20^2 \times 32^2 \rho \mu^6 \Upsilon^8} \\ &\iff c^2 \lesssim \frac{\gamma_{RH}^2}{\kappa^6}. \end{aligned}$$

where the first implication is due to Theorem 4.4; and the second implication is due to Theorem 4.5. Then, we have

$$\mathcal{L}_{\bar{\eta}}^{t,1} - \mathcal{L}_{\bar{\eta}}^{t+1,0} \geq -\frac{\bar{\eta}_2 \bar{\alpha} \beta}{8} \|\nabla \mathcal{L}^{t,0}\|^2.$$

This completes the proof.

## **F Proof of Theorem 4.7**

Summing over  $t$  from  $\tau$  to  $\infty$  on both sides of (11), we have

$$\frac{\bar{\eta}_2 \bar{\alpha} \beta}{8} \sum_{t=\tau}^{\infty} \|\nabla \mathcal{L}^{t,0}\|^2 \leq \mathcal{L}_{\bar{\eta}}^{0,\tau} - \min_{\mathcal{Z} \otimes \Lambda} \mathcal{L}_{\bar{\eta}}(\tilde{\mathbf{z}}, \tilde{\boldsymbol{\lambda}}; \bar{\mathbf{x}}) < \infty.$$

Thus,  $\|\nabla \mathcal{L}^{t,0}\|^2 \rightarrow 0$  as  $t \rightarrow \infty$ . We complete the proof.
